# Supplementary material for: Biodegradability of 27 pyrrolidinium, morpholinium, piperidinium, imidazolium and pyridinium ionic liquid cations under aerobic conditions
Source: Royal Society of Chemistry journal article supplement (doi:10.1039/c3gc41997e), 2014-01-15
Supplement: c3gc41997e.pdf [file c3gc41997e.pdf]

## **Supporting information for Green Chemistry**

**DOI: 10.1039/b000000x**

Jennifer Neumann, Stephanie Steudte, Chul-Wong Cho, Jorg Thöming and Stefan Stolte

**Biodegradability of 27 pyrrolidinium, morpholinium, piperidinium, imidazolium and pyridinium ionic liquid cations under aerobic conditions**

**Electronic supporting information**

# “Primarily and readily biodegradable”

## Ionic liquid

### Primary degradation test

via specific analysis of the cation  
by ion chromatography  
(n = 2)

Reference substance: aniline (black column)

### Ready biodegradation test

via biological oxygen demand  
by WTW Oxitop® devices  
(n = 2; both replicates shown)

Reference substance: benzoic acid (n = 2; black dashes)

## C<sub>8</sub>mpyr Cl

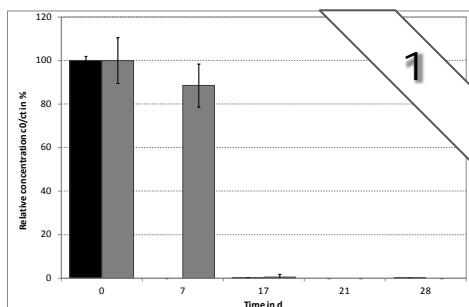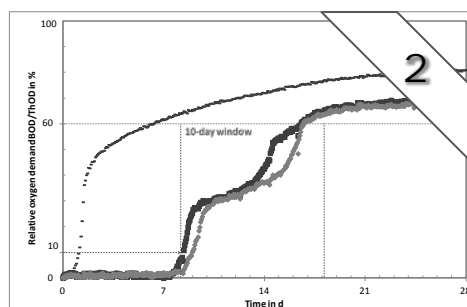

## C<sub>30H</sub>mpyr Cl

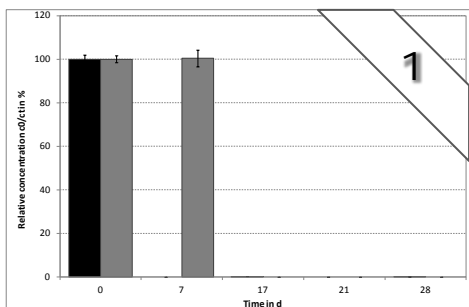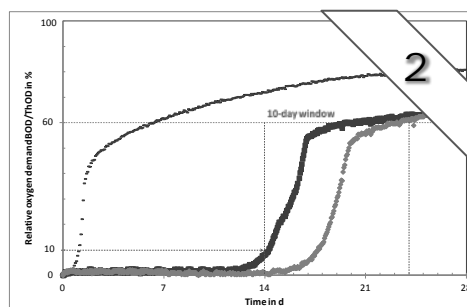

## Classification

1

“Fully primarily degradable”

A 100 % decrease in relative concentration of the parent compound;  
such a chemical is “potentially readily biodegradable”

→ Further testing on “ready biodegradability” using measurements on biological oxygen demand

2

“Readily biodegradable”

The biological oxygen demand reaches 60 % of the theoretical oxygen demand within 28 d in a time window of 10 d (starting after 10 % relative oxygen demand is attained); such a chemical is assumed to degrade rapidly and completely in aquatic environments under aerobic conditions, i.e. there is very low or no risk of persistency under the denoted conditions

→ No further testing in this study

# “Primarily and inherently biodegradable”

## Ionic liquid

### Primary degradation test

via specific analysis of the cation  
by ion chromatography  
(n = 2)

Reference substance: aniline (black column)

### Full mineralisation test

via biological oxygen demand  
by WTW Oxitop® devices  
(n = 2; both replicates shown)

Reference substance: benzoic acid (n = 2; black)

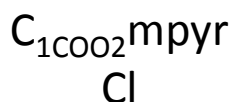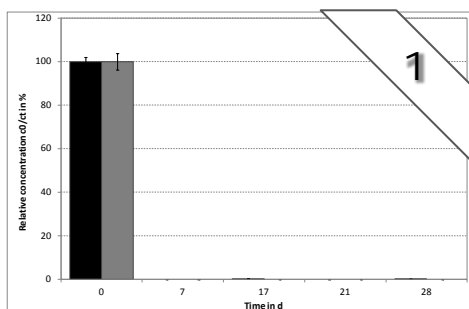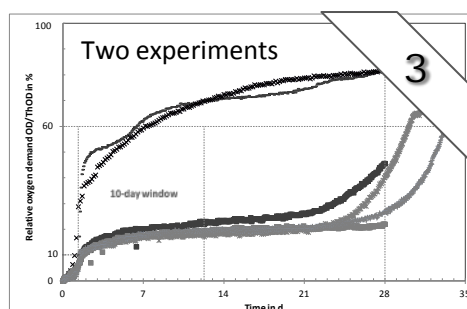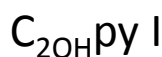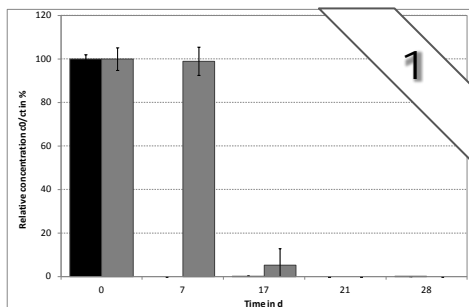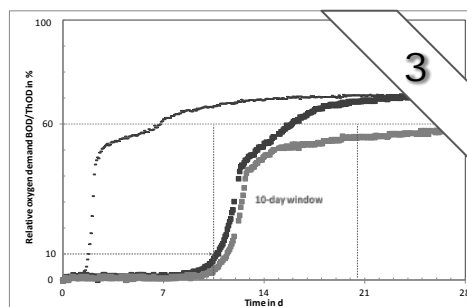

## Classification

1

“Fully primarily degradable”

A 100 % decrease in relative concentration of the parent compound;  
such a chemical is “potentially readily biodegradable”

→ Further testing on “ready biodegradability” using measurements on biological oxygen demand

3

“Inherently biodegradable”

The chemical is not readily biodegradable, but there is unequivocal evidence of biodegradation in both tests of biodegradability (primary or full mineralisation); the chemical has potential for biodegradation under aerobic conditions; i.e. there is low risk of persistency under the denoted conditions

→ No further testing in this study

# “Primarily and inherently biodegradable”

## Ionic liquid

### Primary degradation test

via specific analysis of the cation  
by ion chromatography  
(n = 2)

Reference substance: aniline (black column)

### Full mineralisation test

via biological oxygen demand  
by WTW Oxitop® devices  
(n = 2; both replicates shown)

Reference substance: benzoic acid (n = 2; black)

$C_{30H_{55}mmor}$  Cl

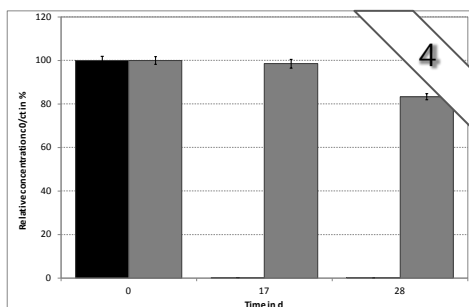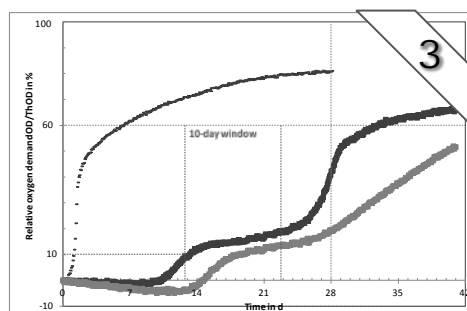

## Classification

4

“Partly primarily degradable”

No 100 % decrease in relative concentration at the end of the experimental run time

→ Further testing using measurements on biological oxygen demand

3

“Inherently biodegradable”

The chemical is not readily biodegradable, but there is unequivocally evidence of biodegradation in both tests of biodegradability (primary or full mineralisation); the chemical has potential for biodegradation under aerobic conditions; i.e. there is low risk of persistency under the denoted conditions

→ No further testing in this study

# “Primarily and inherently biodegradable”

## Primary degradation test

via specific analysis of the cation  
by ion chromatography  
(n = 2)

Reference substance: aniline (black column)

## Full mineralisation test

via biological oxygen demand  
by WTW Oxitop® devices  
(n = 2; both replicates shown)

Reference substance: benzoic acid (n = 2; black)

### Ionic liquid

C<sub>4</sub>mpyr Br

Not tested

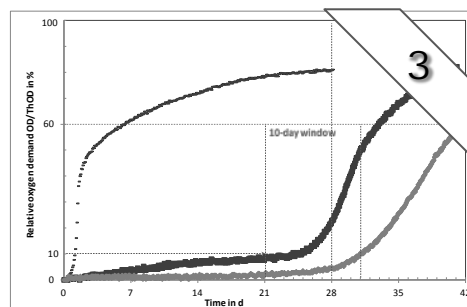

C<sub>30H</sub>mpip Cl

Not tested

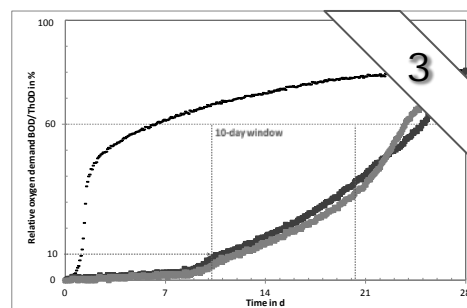

C<sub>30H</sub>py Cl

Not tested

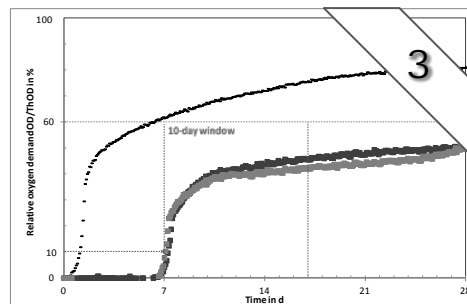

C<sub>20H</sub>mpip Cl

Not tested

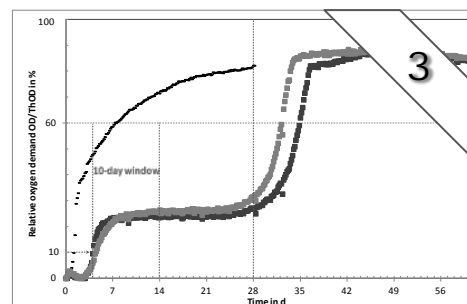

## Classification

3

“Inherently biodegradable”

The chemical is not readily biodegradable, but there is unequivocal evidence of biodegradation in both tests of biodegradability (primary or full mineralisation); the chemical has potential for biodegradation under aerobic conditions; i.e. there is low risk of persistency under the denoted conditions

→ No further testing in this study

# "Primarily, but not readily biodegradable"

## Primary degradation test

via specific analysis of the cation  
by ion chromatography  
(n = 2)

## Ready biodegradation test

via biological oxygen demand  
by WTW Oxitop® devices  
(n = 2; both replicates shown)

### Ionic liquid

Reference substance: aniline (black column)

Reference substance: benzoic acid (n = 2; black dashes)

$C_{1CN}mmor\ Cl$

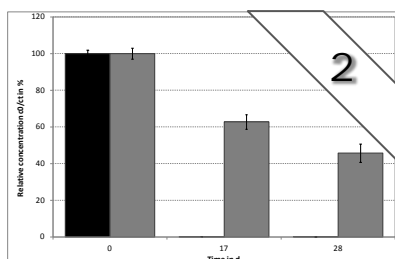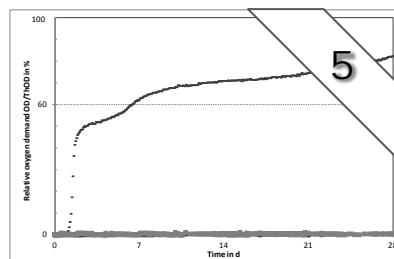

$C_{1CN}mpyr\ Cl$

See discussion on  
 $C_{1CN}mmor\ Cl$

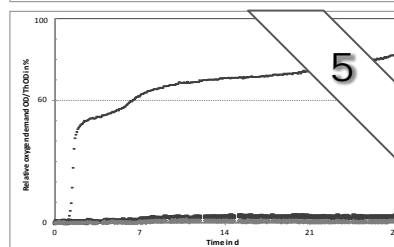

$C_{1CN}mpip\ Cl$

See discussion on  
 $C_{1CN}mmor\ Cl$

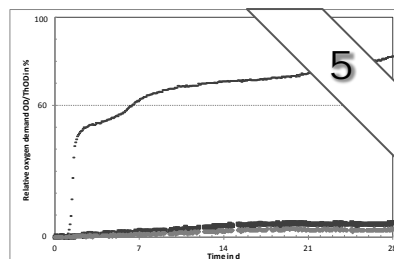

$C_{1CN}py\ Cl$

See discussion on  
 $C_{1CN}mmor\ Cl$

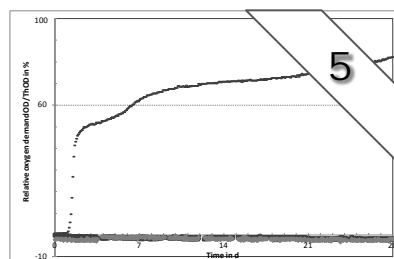

$C_{1CN}mim\ Cl$

See discussion on  
 $C_{1CN}mmor\ Cl$

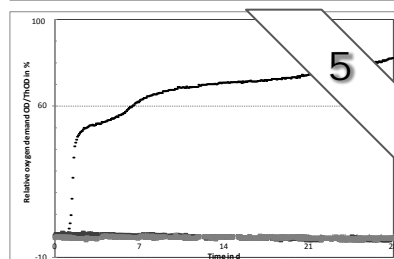

## Classification

4

"Partly primarily degradable"

No 100 % decrease in relative concentration at the end of the experimental run time

→ Further testing using measurements on biological oxygen demand and mass spectrometry

5

"Not readily biodegradable"

The chemical cannot be unequivocally classified as readily or inherently biodegradable under the experimental conditions

→ No further testing in this study

# "Primarily, but not readily biodegradable"

## Ionic liquid

### Primary degradation test

via specific analysis of the cation  
by ion chromatography  
(n = 2)

Reference substance: aniline (black column)

### Full mineralisation test

via biological oxygen demand  
by WTW Oxitop® devices  
(n = 2; both replicates shown)

Reference substance: benzoic acid (n = 2; black)

$C_{2OH}mmor\ I$

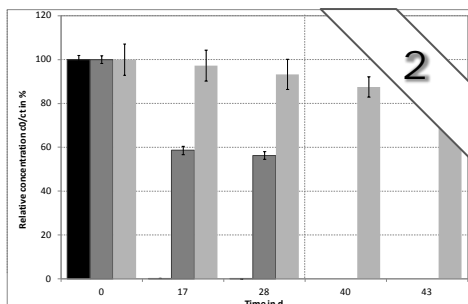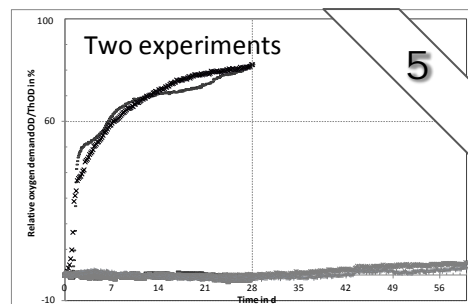

$C_{2OH}mpyr\ I$

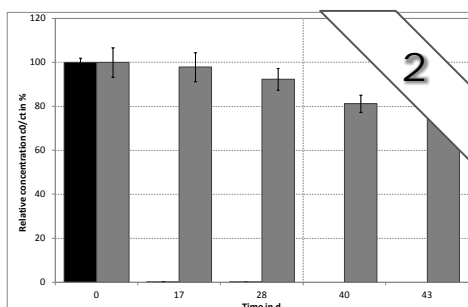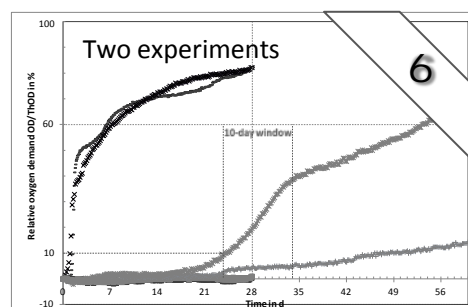

## Classification

4

"Partly primarily degradable"

No 100 % decrease in relative concentration at the end of the experimental run time

→ Further testing using measurements on biological oxygen demand and mass spectrometry

5

"Not readily biodegradable"

The chemical cannot be unequivocally classified as readily or inherently biodegradable under the experimental conditions

→ No further testing in this study

6

"Not readily biodegradable, but hints for being inherently biodegradable"

The chemical cannot be unequivocally classified as readily or inherently biodegradable under the experimental conditions, but showed in more than half of the experiments (primary and full mineralisation) a potential for being biodegradable

→ No further testing in this study

# "Not primarily degradable"

## Ionic liquid

### Primary degradation test

via specific analysis of the cation  
by ion chromatography  
(n = 2)

Reference substance: aniline (black column)

### Ready biodegradation test

via biological oxygen demand  
by WTW Oxitop® devices  
(n = 2; both replicates shown)

Reference substance: benzoic acid (n = 2; black dashes)

C<sub>2</sub>mpyr  
C<sub>2</sub>OSO<sub>3</sub>

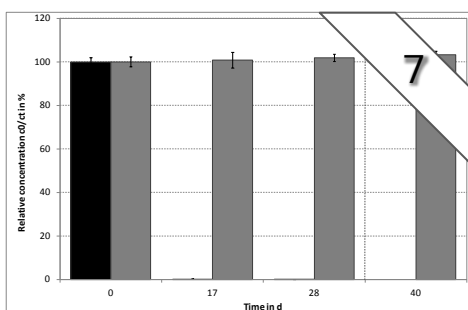

Not tested

C<sub>102</sub>mmor Cl

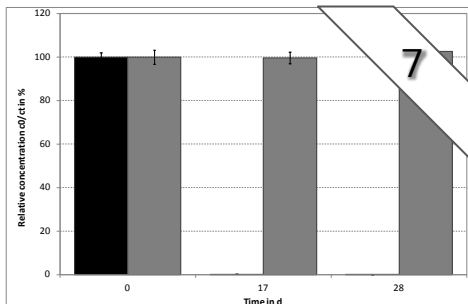

Not tested

C<sub>201</sub>mmor Cl

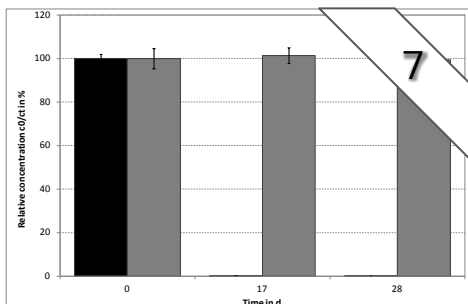

Not tested

C<sub>202</sub>mmor Br

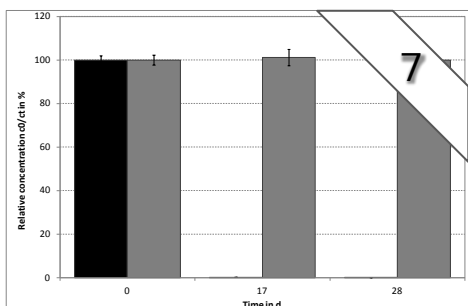

Not tested

## Classification

7

"Not primarily degradable"

No decrease in relative concentration

→ No further testing in this study



# "Not primarily degradable"

## Ionic liquid

### Primary degradation test

via specific analysis of the cation  
by ion chromatography  
(n = 2)

Reference substance: aniline (black column)

### Ready biodegradation test

via biological oxygen demand  
by WTW Oxitop® devices  
(n = 2; both replicates shown)

Reference substance: benzoic acid (n = 2; black dashes)

C<sub>4</sub>mmor Br

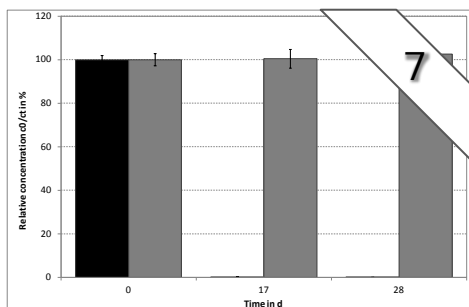

Not tested

C<sub>102</sub>mpip Cl

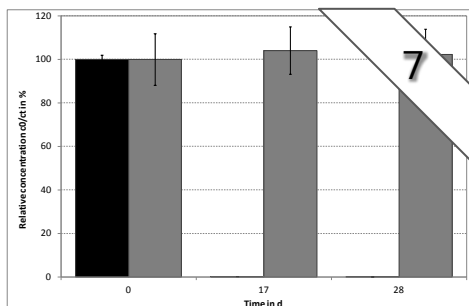

Not tested

C<sub>201</sub>mpip Cl

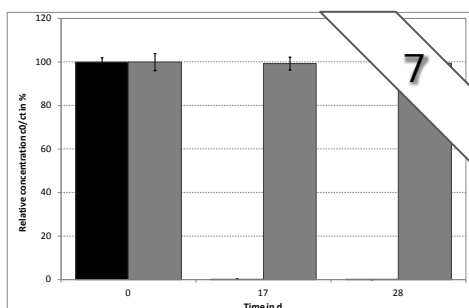

Not tested

## Classification

7

"Not primarily degradable"

No decrease in relative concentration

→ No further testing in this study

# "Not readily biodegradable"

## Primary degradation test

via specific analysis of the cation  
by ion chromatography  
(n = 2)

## Ready biodegradation test

via biological oxygen demand  
by WTW Oxitop® devices  
(n = 2; both replicates shown)

Reference substance: aniline (black column)

Reference substance: benzoic acid (n = 2; black dashes)

### Ionic liquid

C<sub>3</sub>py Br

Not tested

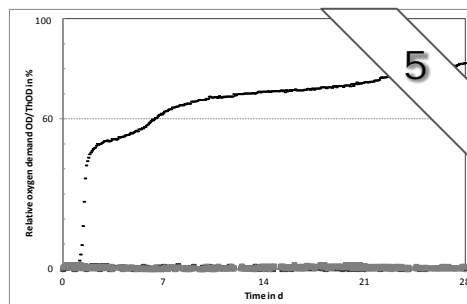

C<sub>3</sub>mim PF<sub>6</sub>

Not tested

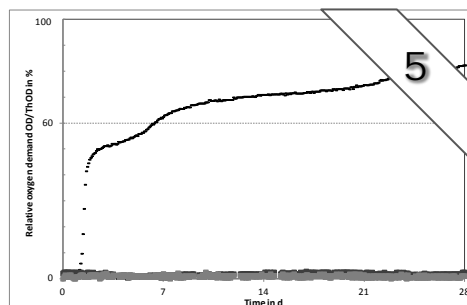

C<sub>3</sub>mpip  
(CF<sub>3</sub>SO<sub>2</sub>)<sub>2</sub>N

Not tested

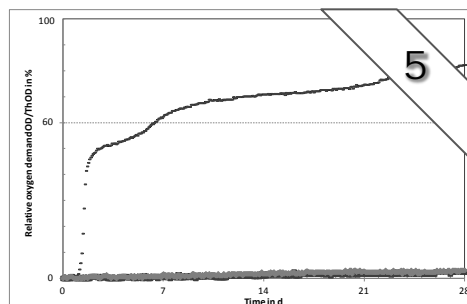

C<sub>4</sub>mpip Br

Not tested

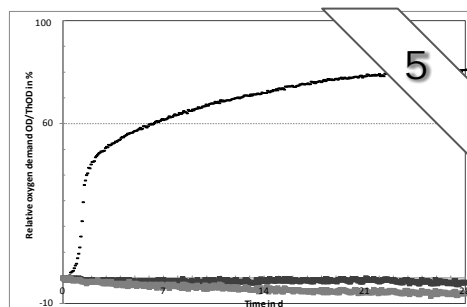

## Classification

5

"Not readily biodegradable"

The chemical cannot be unequivocally classified as readily biodegradable under the experimental conditions

→ No further testing in this study
